# Supplementary material for: Photooxidative stress-inducible orange and pink water-soluble astaxanthin-binding proteins in eukaryotic microalga
Source: PubMed Central journal article supplement (PMC7477208; doi:10.1038/s42003-020-01206-7), 2020-09-07
Supplement: 42003_2020_1206_MOESM1_ESM.pdf [file 42003_2020_1206_MOESM1_ESM.pdf]

## **Supplementary information**

**Photooxidative stress-inducible orange and pink water-soluble astaxanthin-binding proteins in eukaryotic microalga**

Shinji Kawasaki, Keita Yamazaki, Tohya Nishikata, Taichiro Ishige,

Hiroki Toyoshima and Ami Miyata

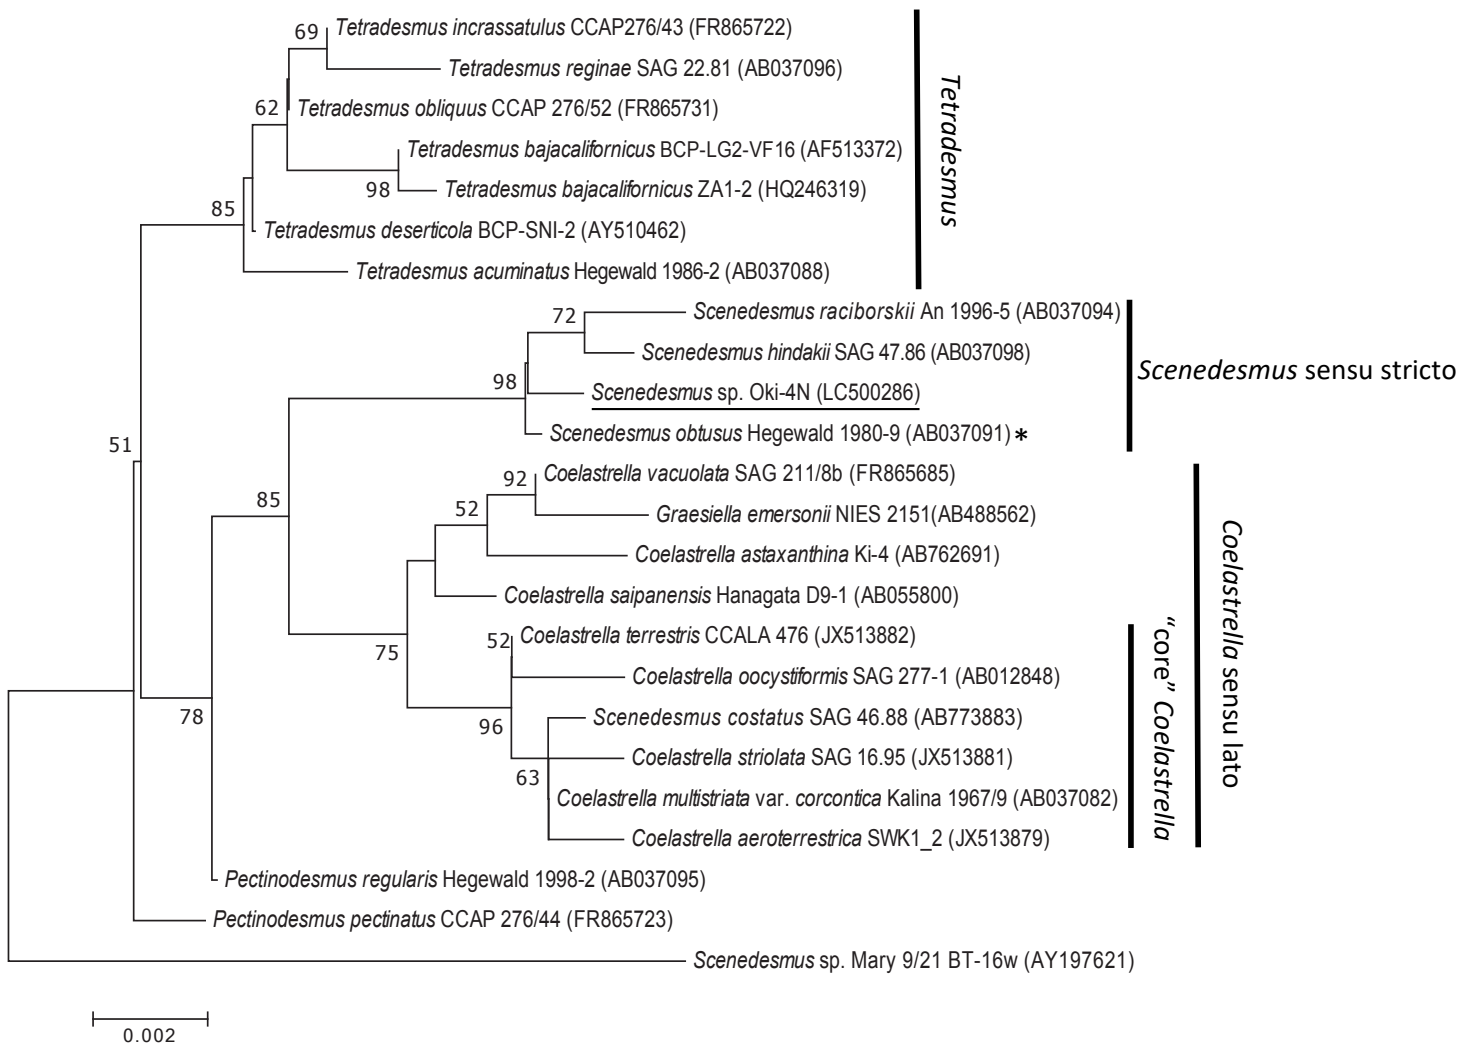

**Supplementary Figure 1.** Phylogenetic tree of the 18S rRNA gene sequence. Phylogenetic tree of the 18S rRNA gene sequence was constructed using a neighbour-joining (NJ) method using MEGA v. 7.0.2 according to a previous study<sup>24</sup>. Bootstrap values are indicated at the branch points present in >50% of the bootstrap trees. Numbers in parentheses indicate the accession numbers. *Scenedesmus* sp. Oki-4N is underlined. *Scenedesmus obtusus*, a type species of the genus *Scenedesmus*, is asterisked. Scale bar = 0.002 substitutions per site.

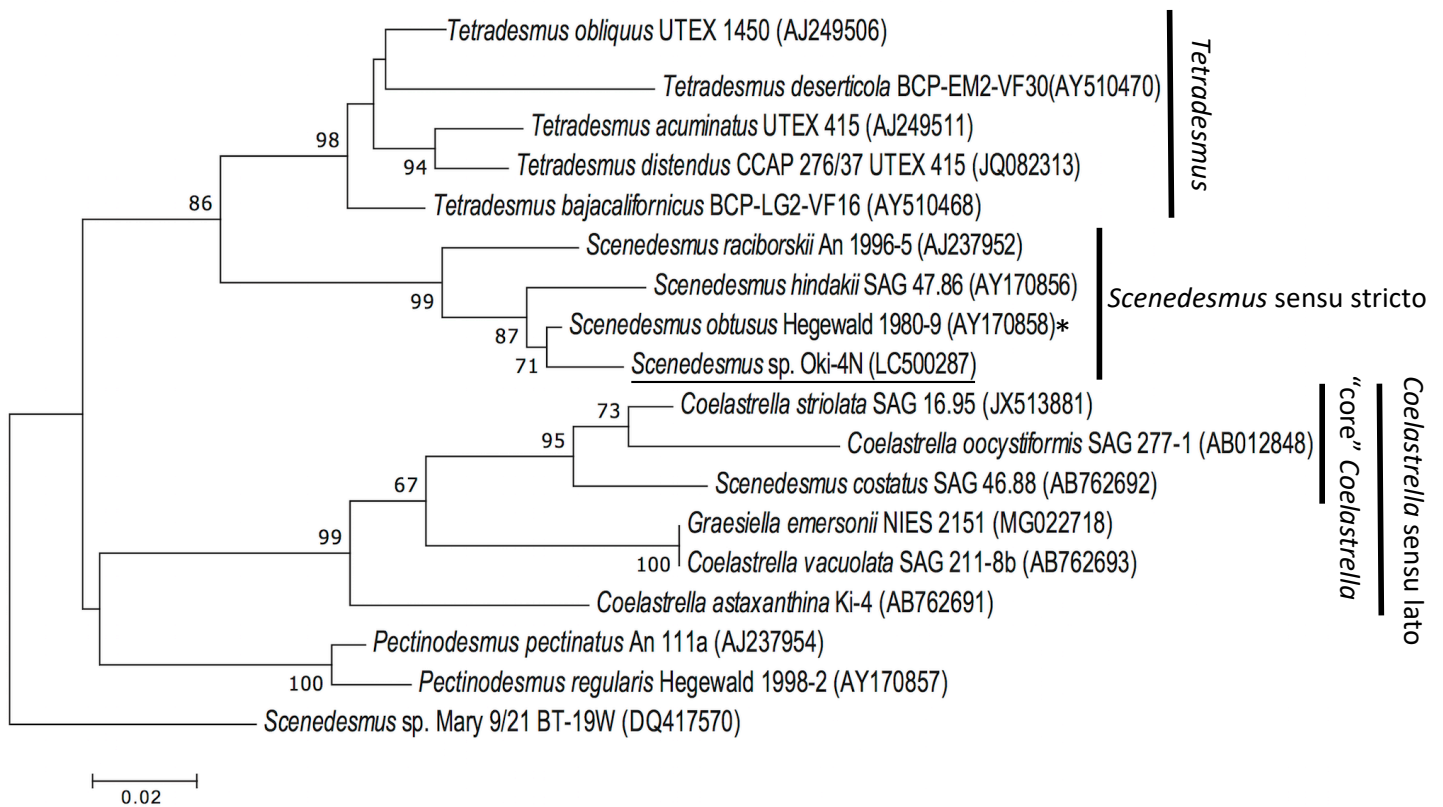

**Supplementary Figure 2.** Phylogenetic tree of ITS2 gene sequence. Phylogenetic tree of the ITS2 gene sequence was constructed using a neighbour-joining (NJ) methods in MEGA v. 7.0.2 according to a previous study<sup>24</sup>. Bootstrap values are indicated at the branch points present in >50% of the bootstrap trees. Numbers in parentheses indicate the accession numbers. *Scenedesmus* sp. Oki-4N is underlined. *Scenedesmus obtusus*, a type species of the genus *Scenedesmus*, is asterisked. Scale bar = 0.02 substitutions per site.

**Supplementary Table 1.** Relative peak intensities of each elution peak in Fig. 1d. Peak areas were analysed by LaChrome Elite software (Hitachi).

| Stress days | Peak area ( $\times 10^4$ )* |        |        |
|-------------|------------------------------|--------|--------|
|             | 0 day                        | 2 days | 4 days |
| Peak-2      | ND                           | 127    | 230    |
| Peak-3      | ND                           | 125    | 211    |

ND: Not detected

\* Peak area was measured at each peak top.

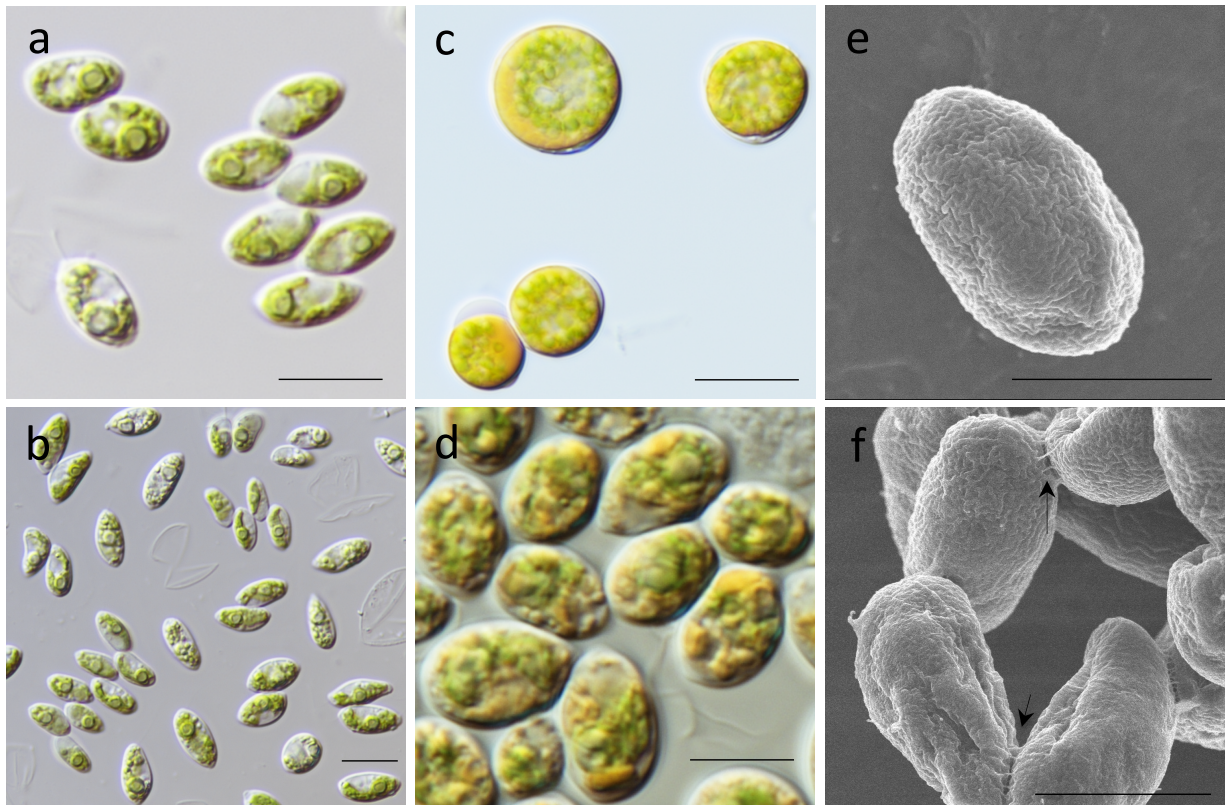

**Supplementary Figure 3.** Microscopic analyses of OKi-4N. The observed cell features of OKi-4N by optical microscopy (**a-d**) and scanning electron micrographs (**e, f**). Scale bar = 10  $\mu\text{m}$ . **a, b** Optical microscopic analysis of non-stressed cells revealed that this organism is unicellular or sometimes present in two-, four-, and eight-celled coenobia, oval in shape, and non-flagellar. Each cell contains a pyrenoid, chloroplasts covering the cell sphere, and is uninucleate. **c** Optical microscopy of the cells that were subjected to 0.25 M NaCl w/HL for two weeks. The cells produced large amounts of orangish pigments that covered cell components. **d** Optical microscopy of the cells that were subjected to 0.5 M NaCl w/HL for two weeks. The orangish pigments were localized in the surface portion of the cell or in small vesicles. **e, f** SEM micrographs revealed a smooth cell surface without ornamentations, such as surface ribs which are typically observed in *Coelastrella* species<sup>24</sup>. Arrows indicate fine strands that connect neighbouring cells for the formation of coenobia. Based on genotypical and morphological characterization, the OKi-4N strain was suggested to belong to the genus *Scenedesmus*. Therefore, we tentatively named this strain *Scenedesmus* sp. OKi-4N.

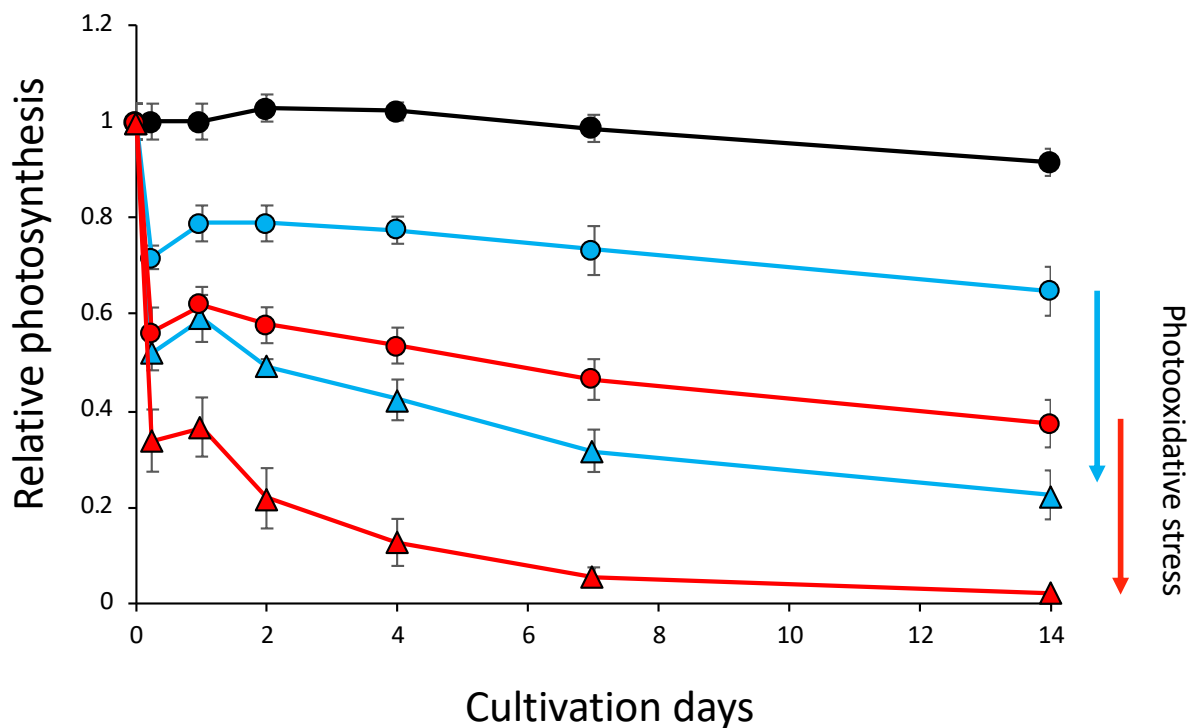

**Supplementary Figure 4.** Photosynthetic activity of Oki-4N under photo-oxidative stress conditions. Photosynthetic activity was measured by a Clark-type oxygen electrode. Cells were cultivated under low light (LL,  $50 \mu\text{mol m}^{-2} \text{s}^{-1}$ ) or high light (HL,  $800 \mu\text{mol m}^{-2} \text{s}^{-1}$ ) conditions with or without salt stress. Photosynthesis was measured for non-stressed cells grown under HL (black circles), 0.25 M NaCl with LL (blue circles) or HL (blue triangles), and 0.5 M NaCl with LL (red circles) or HL (red triangles) and were measured for two weeks after the stress treatments. For each measurement, the cell concentration was adjusted to an  $\text{OD}_{750}$  value of 1.0. The data represent the average and standard deviation of biological triplicates.

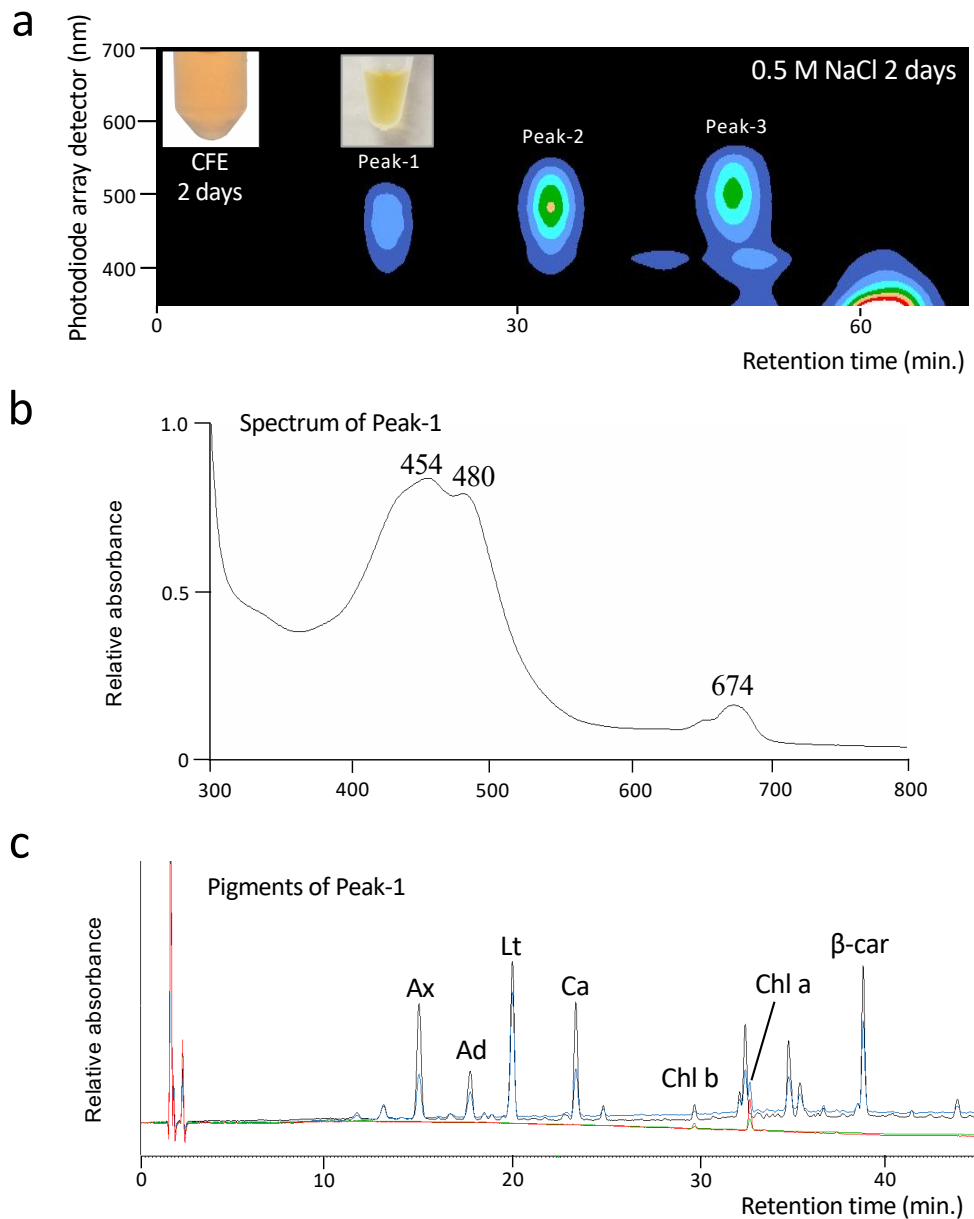

**Supplementary Figure 5.** Characterization of Peak-1. **a** Elution profiles of gel-filtration column chromatography using salt-stressed (0.5 M NaCl stress for 2 days) Oki-4N cell extracts obtained after ultracentrifugation at  $100,000 \times g$ . Elution profiles were monitored by using an HPLC photodiode array detector. Pictures of CFE and Peak-1 are shown. **b** Spectrum of Peak-1. **c** HPLC elution profiles of the binding pigments of Peak-1 monitored by 420 nm (blue line), 480 nm (black line), 640 nm (green line), and 660 nm (red line). Pigments were determined based on the absorption spectra obtained using an HPLC photodiode array detector, HPLC retention times, and molecular masses in high resolution liquid chromatography/mass spectrometry analysis compared to standard compounds as described previously<sup>23</sup>. Ax: astaxanthin, Ad: adonixanthin, Lt: lutein, and Ca: canthaxanthin, Chl a: Chlorophyll *a*, Chl b: Chlorophyll *b*,  $\beta$ -car:  $\beta$ -carotene.

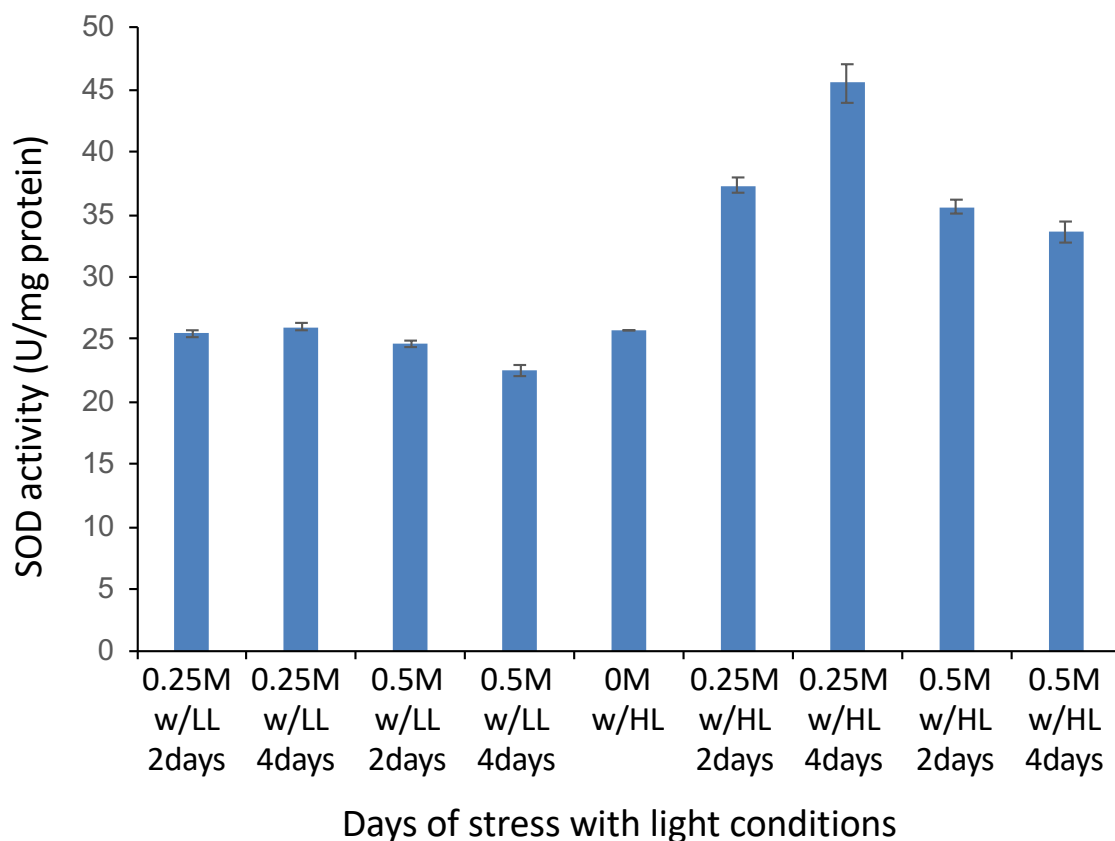

**Supplementary Figure 6. Superoxide dismutase activity of cells grown under photooxidative stress conditions.** SOD activity was determined by ferricytochrome c-xanthine oxidase method. Cells were cultivated under high light (HL,  $800 \mu\text{mol m}^{-2} \text{s}^{-1}$ ) conditions. When the cell growth reached  $\text{OD}_{750}=1.0 \text{ cm}^{-1}$ , salt stress was started by the addition of sterilized NaCl with low light (LL,  $50 \mu\text{mol m}^{-2} \text{s}^{-1}$ ) or high light (HL,  $800 \mu\text{mol m}^{-2} \text{s}^{-1}$ ) conditions. SOD was measured for non-stressed cells grown under HL (0M NaCl with HL, 0M w/HL), 0.25 M NaCl with LL (0.25M w/LL) or HL (0.25M w/HL), and 0.5 M NaCl with LL (0.5M w/LL) or HL (0.5M w/HL) for 2 or 4 days. One unit of SOD activity is defined as the amount of protein that inhibits the rate of cytochrome c reduction by 50%. The data represent the average and standard deviation of triplicate assays.



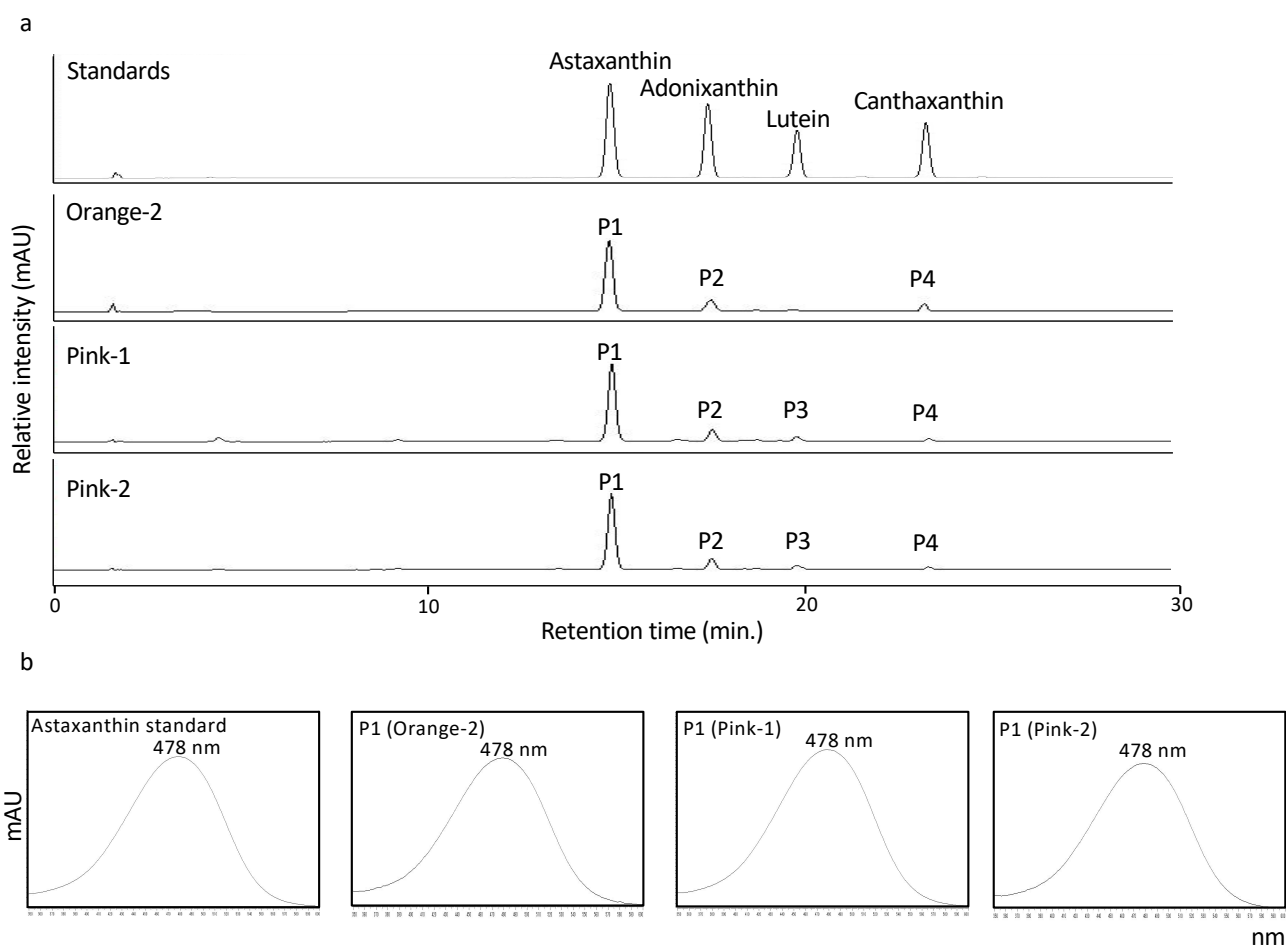

**Supplementary Figure 7.** Determination of carotenoids bound to Oki-4N AstaP proteins using an HPLC photodiode array detector. **a** Elution profiles of authentic standards and the binding pigments of Oki-4N AstaP-orange2, AstaP-pink1, and AstaP-pink2. The HPLC retention time is shown below the HPLC profiles. **b** Spectrum of an authentic astaxanthin and the P1 pigments from each of the AstaP proteins. Each P1 pigment matched that of the astaxanthin standard with regard to retention times, spectral features, and the  $m/z$  values obtained from high-resolution LC/MS/MS analysis. The MS-MS spectra of each P1 pigment was matched with that of astaxanthin in the mzCloud database using Compound Discoverer v. 2.1.

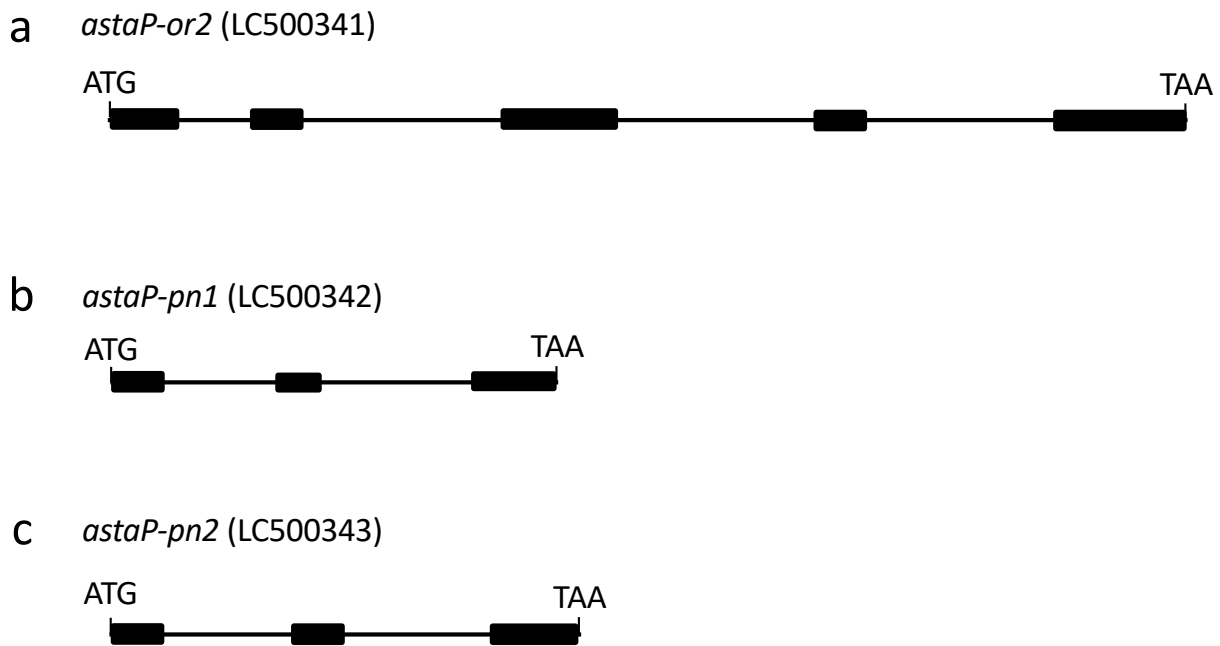

**Supplementary Figure 8. Genome structure of the *astaP* genes.** **a** Genome structure of *astaP-or2* encoding AstaP-orange2. **b** Genome structure of *astaP-pn1* encoding AstaP-pink1. **c** Genome structure of *astaP-pn2* encoding AstaP-pink2. The start and stop codons are indicated. Filled boxes represent exons, and the lines between filled boxes represent introns. Numbers in parentheses indicate the accession numbers.





## Supplementary References

23. Kawasaki, S., Mizuguchi, K., Sato, M., Kono, T. & Shimizu, H. A novel astaxanthin-binding photooxidative stress-inducible aqueous carotenoprotein from a eukaryotic microalga isolated from asphalt in midsummer. *Plant Cell Physiol.* **54**, 1027–1040 (2013).
24. Kawasaki, S., Yoshida, R., Ohkoshi, K. & Toyoshima, H. *Coelastrella astaxanthina* sp. nov. (Sphaeropleales, Chlorophyceae), a novel microalga isolated from an asphalt surface in midsummer in Japan. *Phycol. Res.* **68**, 107-114 (2020).
